# Supplementary material
Source: PubMed Central journal article supplement (PMC11100866)
Supplement: NIHMS1539163-supplement-1.pdf [file NIHMS1539163-supplement-1.pdf]

**Appendix tables and figures for “Safety and pharmacokinetics of broadly neutralizing human monoclonal antibody VRC07-523LS in healthy adults: A phase 1 dose-escalation clinical trial” by Gaudinski et al.**

**Table S1. Elevated serum cytokine levels in a subject during infusion reactions following 20 mg/kg IV administrations of VRC07-523LS**

| Cytokine [normal range] <sup>a</sup> | After 1st Infusion | After 2nd Infusion |        | After 3rd Infusion |         |
|--------------------------------------|--------------------|--------------------|--------|--------------------|---------|
|                                      | 60 min             | 60 min             | 90 min | 60 min             | 240 min |
| TNF- $\alpha$ [ $\leq 22$ pg/mL]     | 429                | 257                | 563    | 30                 | 8       |
| IL-6 [ $\leq 5$ pg/mL]               | 32                 | 19                 | 256    | 16                 | 61      |
| IL-13 [ $\leq 5$ pg/mL]              | <5                 | <5                 | 11     | <5                 | <5      |

<sup>a</sup>Levels of histamine, tryptase, IFN- $\gamma$ , IL-1 $\beta$ , sIL-2R, IL-2, IL-4, IL-5, IL-10, IL-8, IL-12, and IL-17 were within normal ranges at all time points tested

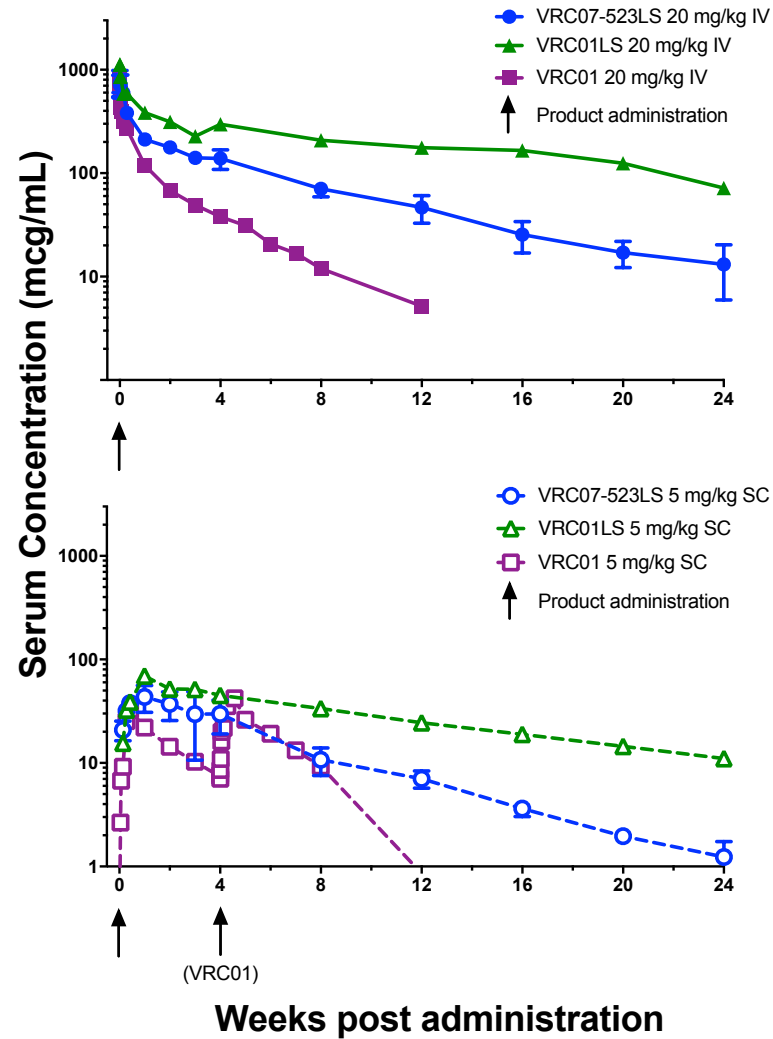

**Figure S1. Comparison of subject serum concentrations (mcg/mL) following a single administration of VRC07-523LS, VRC01LS, or VRC01.** Group geometric mean serum concentrations (mcg/mL) with error bars indicating the standard deviation for up to 24 weeks after receipt of either a single 20 mg/kg IV or 5 mg/kg SC dose of either VRC01, VRC01LS, or VRC07-523LS. Subjects who received VRC01 at 5 mg/kg SC received 2 doses of antibody: at weeks 0 and 4. Upward pointing arrows indicate antibody infusions. Each group includes 3-5 subjects. Data for VRC01 and VRC01LS are shown for comparison and were previously published.<sup>16, 19</sup>

## ADA assessment after VRC07-523LS administration

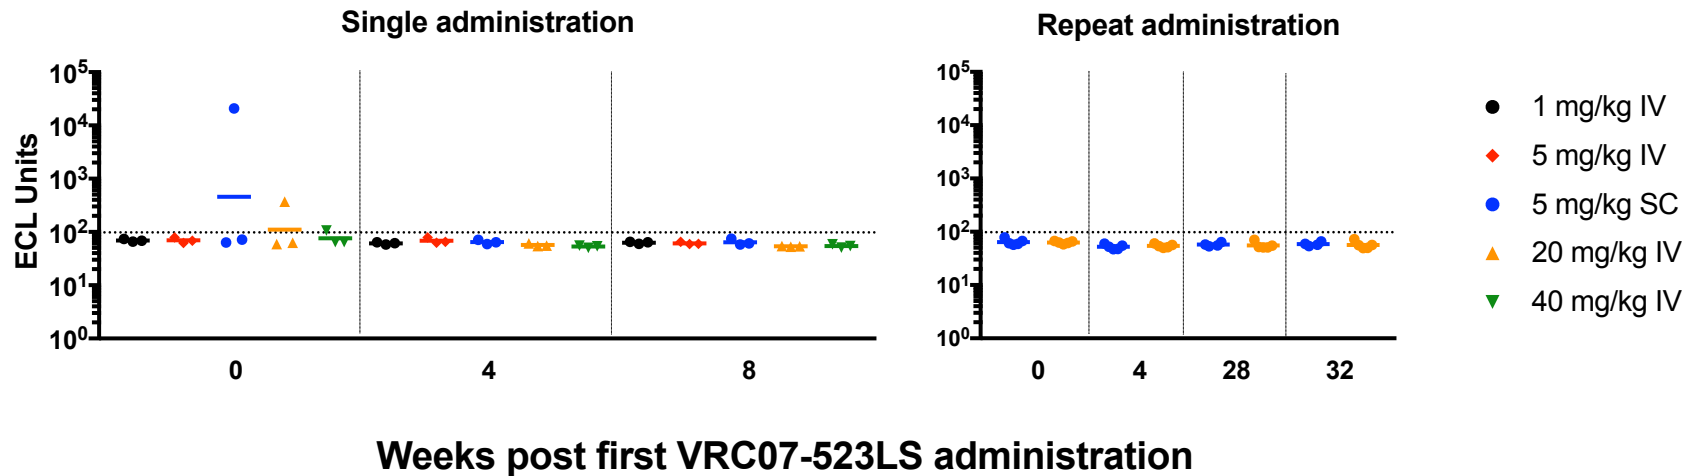

**Figure S2. Anti-drug antibody assessment in subjects after administration of VRC07-523LS.** An electrochemiluminescence (ECL) assay was used to detect the generation of antibodies against VRC07-523LS. Data are shown for subjects receiving a single (left panel) or repeat doses (right panel) of VRC07-523LS. The dotted line indicates the ECL threshold determined by a panel of serum samples from healthy adults who have never received VRC07-523LS.

**Table S2. In vitro IC<sub>50</sub> values for VRC01, VRC01LS, and VRC07-523LS against a small panel of Env-pseudoviruses used to assess serum neutralization after passive transfer of these same antibodies**

| Virus strain    | Clade | VRC07-523LS | VRC01LS | VRC01 | VRC07-523LS vs VRC01 fold higher potency |
|-----------------|-------|-------------|---------|-------|------------------------------------------|
| BG505_W6M_C2    | A     | 0.04        | 0.07    | 0.06  | 1.6                                      |
| Q23.17          | A     | 0.06        | 0.09    | 0.09  | 1.5                                      |
| BJOX028000_10_3 | AE    | 0.01        | 0.16    | 0.15  | 11.4                                     |
| CNE59           | AE    | 0.12        | 0.81    | 0.75  | 6.1                                      |
| PVO.04          | B     | 0.17        | 0.55    | 0.59  | 3.4                                      |
| THRO.18         | B     | 1.57        | 5.89    | 5.97  | 3.8                                      |
| 21197826        | C     | 1.05        | >50     | >50   | >47                                      |
| 21369737        | C     | 0.07        | >50     | >50   | >714                                     |
| 21561324        | C     | 0.03        | 0.35    | 0.43  | 17                                       |
| 6322.V4.C1      | C     | 0.05        | >50     | >50   | >1000                                    |
| 6631_V3         | C     | 0.3         | >50     | >50   | >166                                     |
| CAP210          | C     | 2.6         | >50     | >50   | >19                                      |
| CAP382_2        | C     | 1.12        | >50     | >50   | >44                                      |
| CT565_C7        | C     | 16.96       | >50     | >50   | >2                                       |
| DU156.12        | C     | 0.02        | 0.1     | 0.11  | 4.6                                      |
| MW965.26        | C     | 0.02        | 0.05    | 0.06  | 3.3                                      |
| ZM249M_PL1      | C     | 0.04        | 0.12    | 0.11  | 2.6                                      |
| ZM53M_PB12      | C     | 0.26        | 1.22    | 1.01  | 3.9                                      |
| 3016_V5         | D     | 0.06        | 0.1     | 0.09  | 1.6                                      |
| 57128_VR        | D     | 1.21        | >50     | >50   | >41                                      |
| SIV_MAC251.30   | N/A   | >50         | >50     | >50   | N/A                                      |
| MuLV            | N/A   | >50         | >50     | >50   | N/A                                      |

All antibodies diluted in normal human serum for determination of IC<sub>50</sub> values

Values are shown in mcg/mL

Viruses that were not neutralized by the antibody tested at the input concentration of 50 mcg/mL are displayed as >50

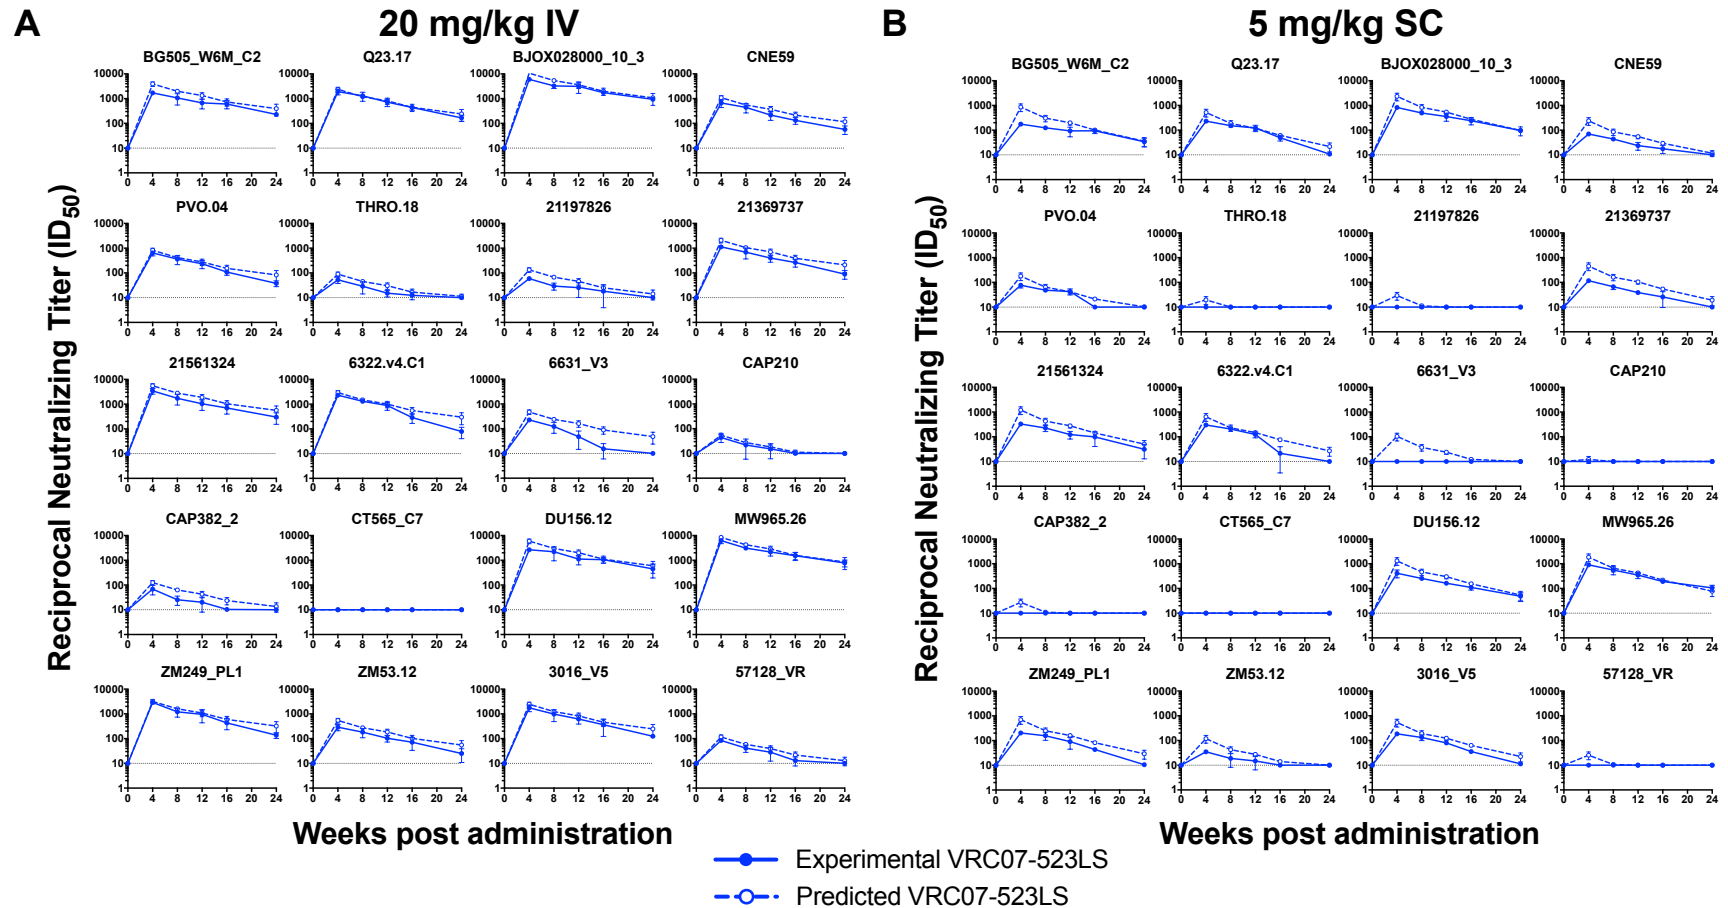

**Figure S3. Neutralizing ability of VRC07-523LS is maintained following administration.** Reciprocal neutralization titers ( $ID_{50}$ ) over time in a subset of subjects who received a single administration of (A) 20 mg/kg IV or (B) 5 mg/kg SC of VRC07-523LS. Solid lines and closed circles represent the reciprocal serum dilution that produces 50% inhibition ( $ID_{50}$ ) of each viral strain. Dashed lines and open circles represent the predicted  $ID_{50}$  based on the measured VRC07-523LS serum concentration and known inhibitory concentration ( $IC_{50}$ ) of VRC07-523LS for each virus tested. Values are the means of duplicate wells in the same plate.  $n=3$  for each dose group. Dotted line at 10 indicates limit of detection for the assay.

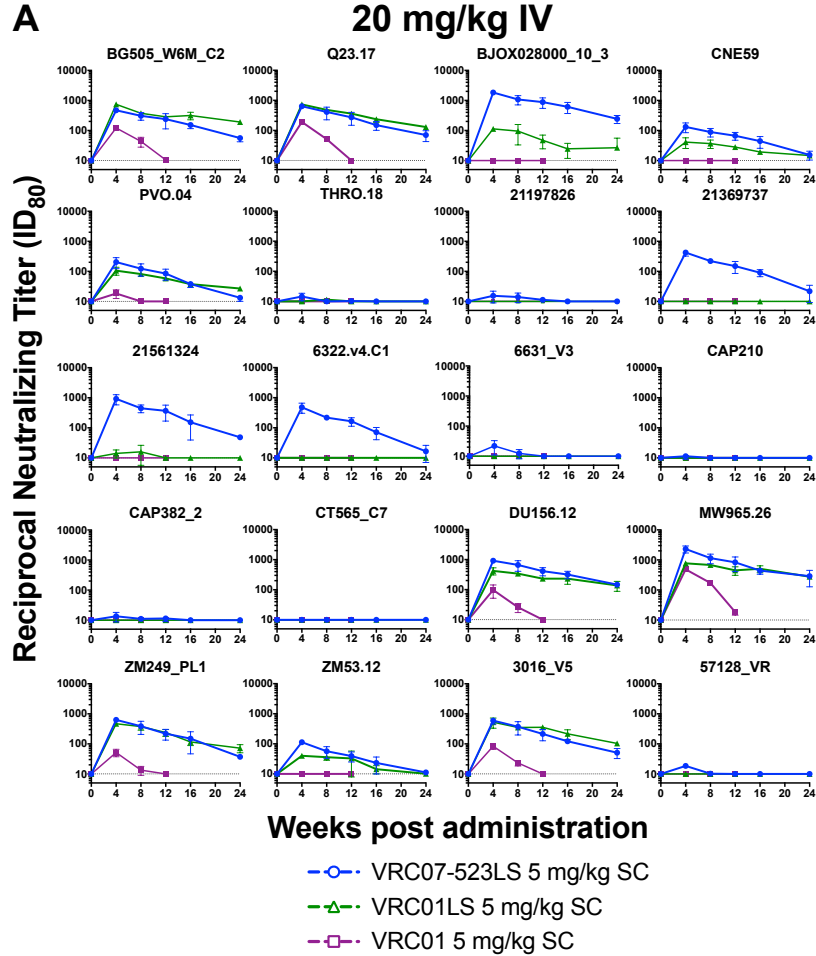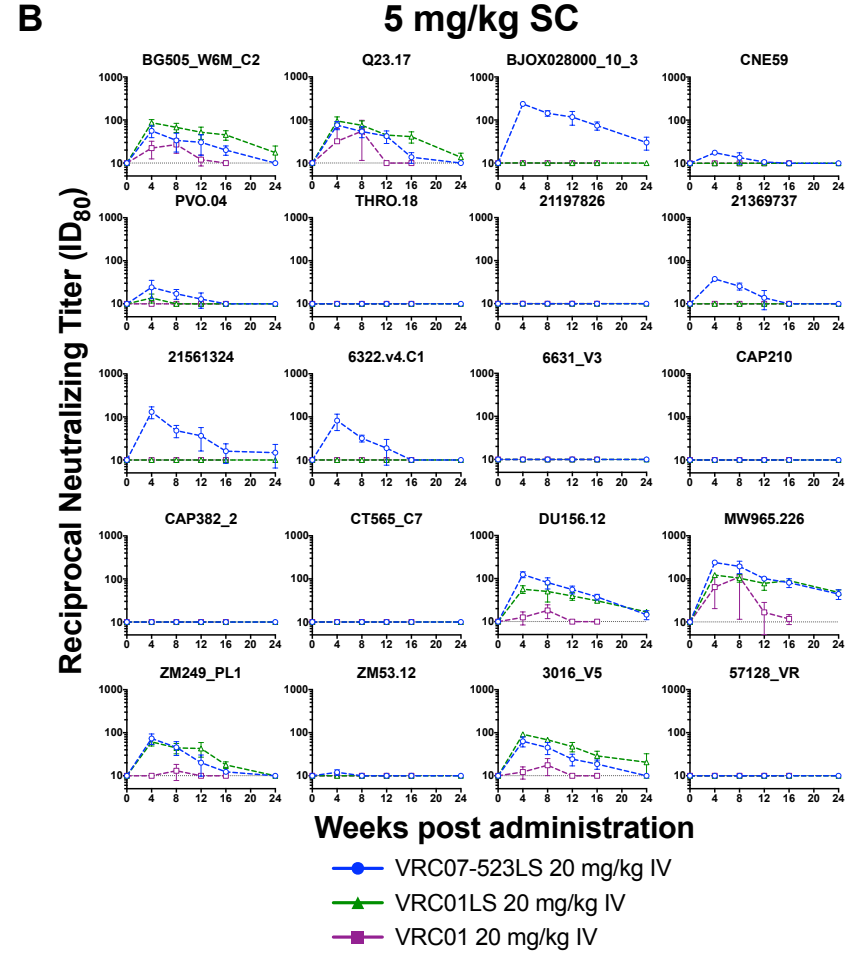

**Figure S4. Neutralization potency by  $ID_{80}$  for up to 24 weeks after a single bnMAb administration using a single round of replication Env-pseudovirus assay.** Reciprocal neutralization titers ( $ID_{80}$ ) over time in subjects who received a single administration of (A) 20 mg/kg IV or (B) 5 mg/kg SC of VRC07-523LS, VRC01LS, or VRC01. Subjects who received VRC01 at 5mg/kg SC received 2 doses of antibody: at weeks 0 and 4.  $n=3$  for each dose group. Dotted line at 10 indicates limit of detection for the assay.

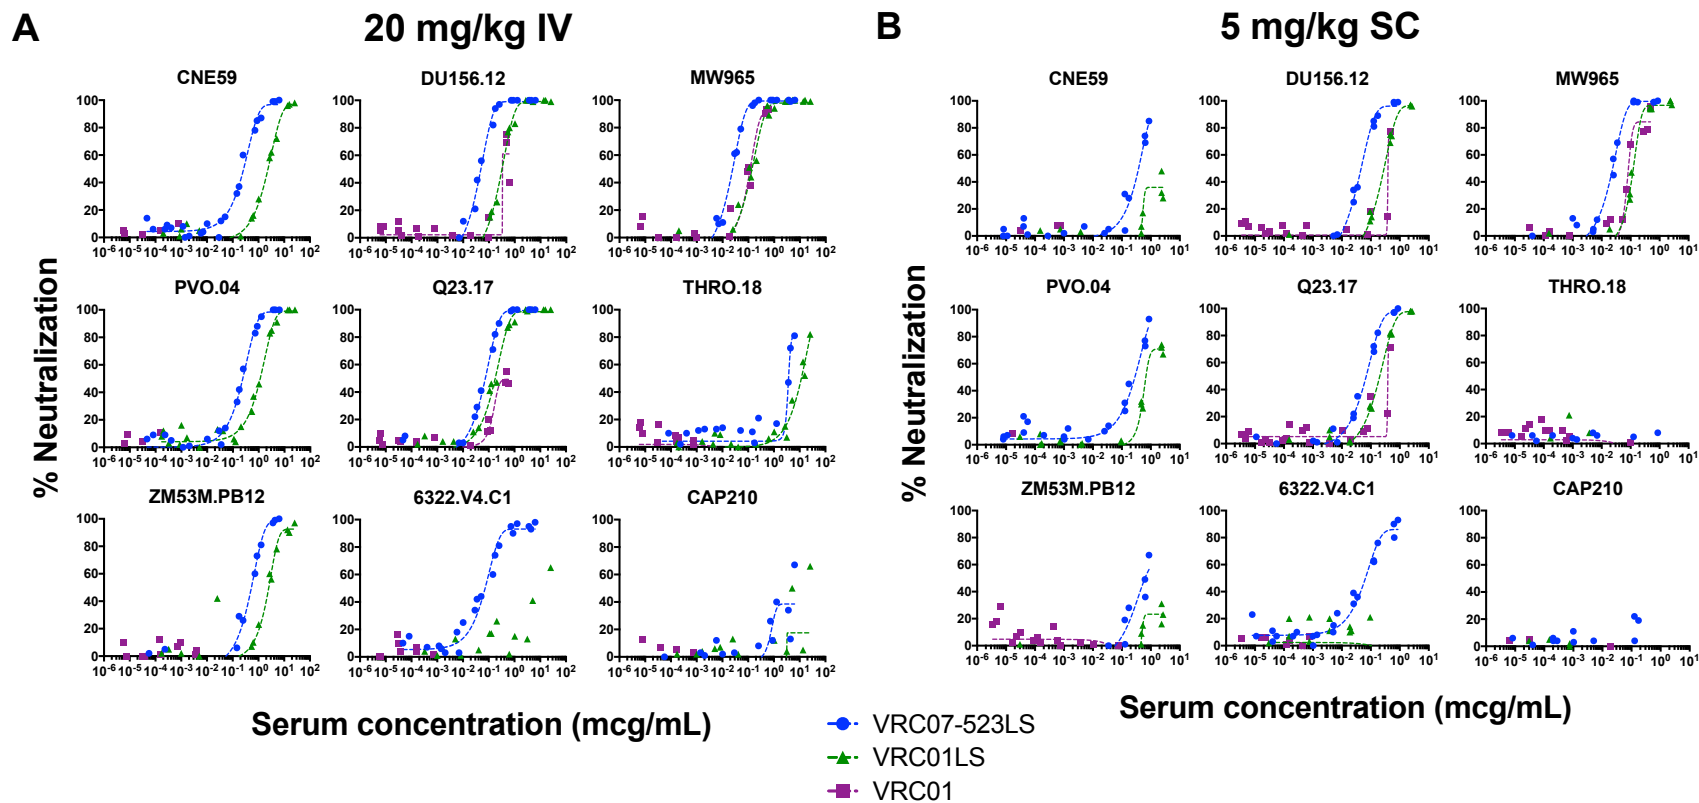

**Figure S5. A selection of neutralization curves at 12 weeks post administration.** Percent neutralization for a subset of viruses tested for serum samples following administration of (A) 20 mg/kg IV or (B) 5 mg/kg SC of VRC07-523LS, VRC01LS, or VRC01. All subjects received a single dose of antibody at week 0, with the exception of VRC01 subjects who received a second dose at 4 weeks. Serial dilutions of subject sera were used to generate neutralization curves against each specified pseudovirus. n=3 for each dose group.



**Table S3. Comparison of ID<sub>50</sub> values at 4 weeks post administration for VRC07-523LS, VRC01LS, and VRC01**

| Virus                                                     | Dose Group  | Virus clade | VRC07-523LS   | VRC01LS        | VRC01          | Fold difference (VRC07-523LS/VRC01LS) <sup>a</sup> |
|-----------------------------------------------------------|-------------|-------------|---------------|----------------|----------------|----------------------------------------------------|
| <b>Serum Concentration mcg/mL (SD)</b>                    |             |             |               |                |                |                                                    |
|                                                           | 5 mg/kg SC  |             | 27 (12), n=8  | 195 (63), n=8  | 7.0 (1.7), n=3 | 0.53                                               |
|                                                           | 20 mg/kg IV |             | 51 (16), n=18 | 286 (85), n=13 | 38 (1.1), n=3  | 0.68                                               |
| <b>Neutralization Titer ID<sub>50</sub> GMT (SD), n=3</b> |             |             |               |                |                |                                                    |
| BG505 W6M C2                                              | 5 mg/kg SC  | A           | 176 (16)      | 268 (29)       | 91 (60)        | 0.65                                               |
|                                                           | 20 mg/kg IV |             | 1685 (284)    | 2203 (882)     | 426 (80)       | 0.77                                               |
| Q23.17                                                    | 5 mg/kg SC  | A           | 231 (20)      | 264 (48)       | 171 (642)      | 0.88                                               |
|                                                           | 20 mg/kg IV |             | 1864 (496)    | 2268 (310)     | 551 (19)       | 0.82                                               |
| BJOX028000_10_3                                           | 5 mg/kg SC  | AE          | 823 (83)      | 121 (42)       | 5 (0)          | 6.81                                               |
|                                                           | 20 mg/kg IV |             | 5992 (396)    | 802 (238)      | 171 (129)      | 7.48                                               |
| CNE59                                                     | 5 mg/kg SC  | AE          | 70 (12)       | 18 (7.3)       | 5 (0)          | 3.80                                               |
|                                                           | 20 mg/kg IV |             | 642 (234)     | 151 (4.2)      | 16 (15)        | 4.26                                               |
| PVO.04                                                    | 5 mg/kg SC  | B           | 76 (17)       | 35 (11)        | 14 (56)        | 2.19                                               |
|                                                           | 20 mg/kg IV |             | 632 (155)     | 325 (43)       | 54 (23)        | 1.95                                               |
| THRO.18                                                   | 5 mg/kg SC  | B           | 5 (0)         | 5 (0)          | 24 (329)       | 1.00                                               |
|                                                           | 20 mg/kg IV |             | 51 (15)       | 21 (9.5)       | 5 (0)          | 2.39                                               |
| 21197826                                                  | 5 mg/kg SC  | C           | 5 (0)         | 5 (0)          | 5 (0)          | 1.00                                               |
|                                                           | 20 mg/kg IV |             | 59 (3.5)      | 5 (0)          | 5 (0)          | 11.85                                              |
| 21369737                                                  | 5 mg/kg SC  | C           | 117 (16)      | 5 (0)          | 5 (0)          | 23.32                                              |
|                                                           | 20 mg/kg IV |             | 1114 (182)    | 5 (0)          | 5 (0)          | 222.86                                             |
| 21561324                                                  | 5 mg/kg SC  | C           | 326 (60)      | 12 (1.6)       | 5 (0)          | 27.28                                              |
|                                                           | 20 mg/kg IV |             | 3362 (898)    | 367 (246)      | 13 (53)        | 9.15                                               |
| 6322.V4.C1                                                | 5 mg/kg SC  | C           | 300 (35)      | 5 (0)          | 5 (0)          | 60.07                                              |
|                                                           | 20 mg/kg IV |             | 2288 (210)    | 5 (0)          | 5 (0)          | 457.6                                              |
| 6631_V3                                                   | 5 mg/kg SC  | C           | 5 (0)         | 5 (0)          | 5 (0)          | 1.00                                               |
|                                                           | 20 mg/kg IV |             | 225 (26)      | 5 (0)          | 5 (0)          | 44.94                                              |
| CAP210                                                    | 5 mg/kg SC  | C           | 5 (0)         | 5 (0)          | 26 (420)       | 1.00                                               |
|                                                           | 20 mg/kg IV |             | 42 (17)       | 5 (0)          | 5 (0)          | 8.44                                               |
| CAP382_2                                                  | 5 mg/kg SC  | C           | 5 (0)         | 5 (0)          | 5 (0)          | 1.00                                               |
|                                                           | 20 mg/kg IV |             | 64 (29)       | 5 (0)          | 5 (0)          | 12.85                                              |
| CT565_C7                                                  | 5 mg/kg SC  | C           | 5 (0)         | 5 (0)          | 5 (0)          | 1.00                                               |
|                                                           | 20 mg/kg IV |             | 5 (0)         | 5 (0)          | 5 (0)          | 1.00                                               |
| DU156.12                                                  | 5 mg/kg SC  | C           | 396 (144)     | 152 (9.9)      | 30 (19)        | 2.60                                               |
|                                                           | 20 mg/kg IV |             | 2654 (370)    | 1356 (255)     | 230 (60)       | 1.96                                               |
| MW965.26                                                  | 5 mg/kg SC  | C           | 900 (19)      | 392 (43)       | 383 (837)      | 2.30                                               |

|            |             |   |             |            |            |       |
|------------|-------------|---|-------------|------------|------------|-------|
|            | 20 mg/kg IV |   | 6107 (1521) | 2228 (368) | 1189 (219) | 2.74  |
| ZM249M PL1 | 5 mg/kg SC  | C | 202 (35)    | 174 (42)   | 21 (12)    | 1.16  |
|            | 20 mg/kg IV |   | 2890 (255)  | 1881 (678) | 191 (63)   | 1.54  |
| ZM53M PB12 | 5 mg/kg SC  | C | 35 (1.2)    | 13 (9.6)   | 5 (0)      | 2.71  |
|            | 20 mg/kg IV |   | 282 (80)    | 128 (13)   | 8.6 (3.7)  | 2.21  |
| 3016 V5    | 5 mg/kg SC  | D | 184 (34)    | 241 (64)   | 25 (9.7)   | 0.76  |
|            | 20 mg/kg IV |   | 1699 (529)  | 1888 (585) | 177 (35)   | 0.90  |
| 57128 VR   | 5 mg/kg SC  | D | 5 (0)       | 5 (0)      | 5 (0)      | 1.00  |
|            | 20 mg/kg IV |   | 84 (11)     | 5 (0)      | 5 (0)      | 16.79 |

IV= intravenous, SC= subcutaneous

<sup>a</sup>Fold difference (VRC07-523LS/VRC01LS) was calculated as the ID<sub>50</sub> GMT of VRC07-523LS divided by the ID<sub>50</sub> GMT of VRC01LS.

ID<sub>50</sub> values <10 are calculated as 5.

**Table S4. Comparison of ID<sub>80</sub> values at 4 weeks post administration for VRC07-523LS, VRC01LS, and VRC01**

| Virus                                                     | Dose Group  | Virus clade | VRC07-523LS   | VRC01LS        | VRC01          | Fold difference (VRC07-523LS/VRC01LS) <sup>a</sup> |
|-----------------------------------------------------------|-------------|-------------|---------------|----------------|----------------|----------------------------------------------------|
| <b>Serum Concentration mcg/mL (SD)</b>                    |             |             |               |                |                |                                                    |
|                                                           | 5 mg/kg SC  |             | 27 (12), n=8  | 195 (63), n=8  | 7.0 (1.7), n=3 | 0.53                                               |
|                                                           | 20 mg/kg IV |             | 51 (16), n=18 | 286 (85), n=13 | 38 (1.1), n=3  | 0.68                                               |
| <b>Neutralization Titer ID<sub>80</sub> GMT (SD), n=3</b> |             |             |               |                |                |                                                    |
| BG505_W6M_C2                                              | 5 mg/kg SC  | A           | 54 (17)       | 86 (15)        | 21 (9.8)       | 0.63                                               |
|                                                           | 20 mg/kg IV |             | 470 (17)      | 742 (20)       | 120 (21)       | 0.63                                               |
| Q23.17                                                    | 5 mg/kg SC  | A           | 75(16)        | 93 (23)        | 23 (31)        | 0.80                                               |
|                                                           | 20 mg/kg IV |             | 632 (88)      | 728 (89)       | 191 (10)       | 0.87                                               |
| BJOX028000_10_3                                           | 5 mg/kg SC  | AE          | 235 (23)      | 6.4 (3.1)      | 5 (0)          | 36.88                                              |
|                                                           | 20 mg/kg IV |             | 1832 (239)    | 113 (14)       | 5 (0)          | 16.25                                              |
| CNE59                                                     | 5 mg/kg SC  | AE          | 18 (0.7)      | 5 (0)          | 5 (0)          | 3.52                                               |
|                                                           | 20 mg/kg IV |             | 126 (47)      | 39 (16)        | 5 (0)          | 3.22                                               |
| PVO.04                                                    | 5 mg/kg SC  | B           | 23 (11)       | 11 (6.1)       | 5 (0)          | 2.13                                               |
|                                                           | 20 mg/kg IV |             | 194 (81)      | 103 (31)       | 18 (5.9)       | 1.89                                               |
| THRO.18                                                   | 5 mg/kg SC  | B           | 5 (0)         | 5 (0)          | 5 (0)          | 1.00                                               |
|                                                           | 20 mg/kg IV |             | 11 (6.9)      | 5 (0)          | 5 (0)          | 2.24                                               |
| 21197826                                                  | 5 mg/kg SC  | C           | 5 (0)         | 5 (0)          | 5 (0)          | 1.00                                               |
|                                                           | 20 mg/kg IV |             | 12 (8.1)      | 5 (0)          | 5 (0)          | 2.31                                               |
| 21369737                                                  | 5 mg/kg SC  | C           | 38 (3.8)      | 5 (0)          | 5 (0)          | 7.51                                               |
|                                                           | 20 mg/kg IV |             | 414 (101)     | 5 (0)          | 5 (0)          | 82.74                                              |
| 21561324                                                  | 5 mg/kg SC  | C           | 127 (40)      | 5 (0)          | 5 (0)          | 25.36                                              |
|                                                           | 20 mg/kg IV |             | 882 (342)     | 11 (6.9)       | 5 (0)          | 81.21                                              |
| 6322.V4.C1                                                | 5 mg/kg SC  | C           | 78 (34)       | 5 (0)          | 5 (0)          | 15.55                                              |
|                                                           | 20 mg/kg IV |             | 459 (176)     | 5 (0)          | 5 (0)          | 91.8                                               |
| 6631_V3                                                   | 5 mg/kg SC  | C           | 5 (0)         | 5 (0)          | 5 (0)          | 1.00                                               |
|                                                           | 20 mg/kg IV |             | 20 (11)       | 5 (0)          | 5 (0)          | 4.07                                               |
| CAP210                                                    | 5 mg/kg SC  | C           | 5 (0)         | 5 (0)          | 5 (0)          | 1.00                                               |
|                                                           | 20 mg/kg IV |             | 7.0 (5.2)     | 5 (0)          | 5 (0)          | 1.41                                               |
| CAP382_2                                                  | 5 mg/kg SC  | C           | 5 (0)         | 5 (0)          | 5 (0)          | 1.00                                               |
|                                                           | 20 mg/kg IV |             | 13 (4.7)      | 5 (0)          | 5 (0)          | 2.60                                               |
| CT565_C7                                                  | 5 mg/kg SC  | C           | 5 (0)         | 5 (0)          | 5 (0)          | 1.00                                               |
|                                                           | 20 mg/kg IV |             | 5 (0)         | 5 (0)          | 5 (0)          | 1.00                                               |
| DU156.12                                                  | 5 mg/kg SC  | C           | 123 (19)      | 56 (11)        | 9.7 (6.3)      | 2.21                                               |
|                                                           | 20 mg/kg IV |             | 912 (117)     | 410 (112)      | 91 (46)        | 2.22                                               |
| MW965.26                                                  | 5 mg/kg SC  | C           | 239 (23)      | 122 (11)       | 56 (44)        | 1.96                                               |

|            |             |   |            |           |           |      |
|------------|-------------|---|------------|-----------|-----------|------|
|            | 20 mg/kg IV |   | 2252 (612) | 770 (74)  | 483 (84)  | 2.92 |
| ZM249M_PL1 | 5 mg/kg SC  | C | 71 (20)    | 61 (12)   | 5 (0)     | 1.18 |
|            | 20 mg/kg IV |   | 626 (92)   | 467 (30)  | 51 (14)   | 1.34 |
| ZM53M_PB12 | 5 mg/kg SC  | C | 9.5 (4.6)  | 5 (0)     | 5 (0)     | 1.89 |
|            | 20 mg/kg IV |   | 112 (18)   | 40 (1.8)  | 5 (0)     | 2.81 |
| 3016_V5    | 5 mg/kg SC  | D | 62 (16)    | 92 (8.6)  | 7.5 (6.7) | 0.67 |
|            | 20 mg/kg IV |   | 584 (137)  | 505 (195) | 82 (18)   | 1.16 |
| 57128_VR   | 5 mg/kg SC  | D | 5 (0)      | 5 (0)     | 5 (0)     | 1.00 |
|            | 20 mg/kg IV |   | 18 (2.6)   | 5 (0)     | 5 (0)     | 3.66 |

IV= intravenous, SC= subcutaneous

<sup>a</sup>Fold difference (VRC07-523LS/VRC01LS) was calculated as the ID<sub>80</sub> GMT of VRC07-523LS divided by the ID<sub>80</sub> GMT of VRC01LS.

ID<sub>80</sub> values <10 are calculated as 5.

**Table S5. Comparison of ID<sub>50</sub> values at 12 weeks post administration for VRC07-523LS, VRC01LS, and VRC01**

| Virus                                                     | Dose Group  | Virus clade | VRC07-523LS    | VRC01LS        | VRC01                       | Fold difference (VRC07-523LS/VRC01LS) <sup>a</sup> |
|-----------------------------------------------------------|-------------|-------------|----------------|----------------|-----------------------------|----------------------------------------------------|
| <b>Serum Concentration mcg/mL (SD)</b>                    |             |             |                |                |                             |                                                    |
|                                                           | 5 mg/kg SC  |             | 6.7 (1.4), n=7 | 27 (7.1), n=18 | 3.7 (1.1), n=3 <sup>b</sup> | 0.25                                               |
|                                                           | 20 mg/kg IV |             | 45 (12), n=8   | 163 (53), n=13 | 5.2 (0.7), n=3              | 0.28                                               |
| <b>Neutralization Titer ID<sub>50</sub> GMT (SD), n=3</b> |             |             |                |                |                             |                                                    |
| BG505_W6M_C2                                              | 5 mg/kg SC  | A           | 87 (39)        | 128 (23)       | 15 (24)                     | 0.68                                               |
|                                                           | 20 mg/kg IV |             | 621 (289)      | 1137 (153)     | 38 (13)                     | 0.55                                               |
| Q23.17                                                    | 5 mg/kg SC  | A           | 120 (35)       | 133 (15)       | 9.3 (16)                    | 0.90                                               |
|                                                           | 20 mg/kg IV |             | 695 (245)      | 1123 (157)     | 9.8 (19)                    | 0.62                                               |
| CNE59                                                     | 5 mg/kg SC  | AE          | 23 (8.3)       | 5 (0)          | 5 (0)                       | 4.51                                               |
|                                                           | 20 mg/kg IV |             | 206 (84)       | 82 (16)        | 5 (0)                       | 2.50                                               |
| BJOX028000_10_3                                           | 5 mg/kg SC  | AE          | 339 (127)      | 16 (7.1)       | 5 (0)                       | 21.56                                              |
|                                                           | 20 mg/kg IV |             | 2899 (1506)    | 393 (171)      | 5 (0)                       | 7.37                                               |
| PVO.04                                                    | 5 mg/kg SC  | B           | 42 (12)        | 28 (3.1)       | 5 (0)                       | 1.50                                               |
|                                                           | 20 mg/kg IV |             | 225 (86)       | 173 (49)       | 5 (0)                       | 1.30                                               |
| THRO.18                                                   | 5 mg/kg SC  | B           | 5 (0)          | 5 (0)          | 5 (0)                       | 1.00                                               |
|                                                           | 20 mg/kg IV |             | 12 (7.4)       | 13 (12)        | 5 (0)                       | 0.90                                               |
| 21197826                                                  | 5 mg/kg SC  | C           | 5 (0)          | 5 (0)          | 5 (0)                       | 1.00                                               |
|                                                           | 20 mg/kg IV |             | 17 (18)        | 5 (0)          | 5 (0)                       | 3.46                                               |
| 21369737                                                  | 5 mg/kg SC  | C           | 38 (7.0)       | 5 (0)          | 5 (0)                       | 7.64                                               |
|                                                           | 20 mg/kg IV |             | 383 (128)      | 5 (0)          | 5 (0)                       | 76.62                                              |
| 21561324                                                  | 5 mg/kg SC  | C           | 117 (42)       | 5 (0)          | 5 (0)                       | 23.49                                              |
|                                                           | 20 mg/kg IV |             | 950 (477)      | 143 (25)       | 5 (0)                       | 6.64                                               |
| 6322.V4.C1                                                | 5 mg/kg SC  | C           | 122 (34)       | 5 (0)          | 5 (0)                       | 24.32                                              |
|                                                           | 20 mg/kg IV |             | 843 (314)      | 8.8 (13)       | 5 (0)                       | 96.11                                              |
| 6631_V3                                                   | 5 mg/kg SC  | C           | 5 (0)          | 5 (0)          | 5 (0)                       | 1.00                                               |
|                                                           | 20 mg/kg IV |             | 28 (36)        | 5 (0)          | 5 (0)                       | 5.59                                               |
| CAP210                                                    | 5 mg/kg SC  | C           | 5 (0)          | 5 (0)          | 5 (0)                       | 1.00                                               |
|                                                           | 20 mg/kg IV |             | 8.7 (12)       | 11 (31)        | 5 (0)                       | 0.76                                               |
| CAP382_2                                                  | 5 mg/kg SC  | C           | 5 (0)          | 5 (0)          | 5 (0)                       | 1.00                                               |
|                                                           | 20 mg/kg IV |             | 14 (14)        | 5 (0)          | 5 (0)                       | 2.83                                               |
| CT565_C7                                                  | 5 mg/kg SC  | C           | 5 (0)          | 5 (0)          | 5 (0)                       | 1.00                                               |
|                                                           | 20 mg/kg IV |             | 5 (0)          | 5 (0)          | 5 (0)                       | 1.00                                               |
| DU156.12                                                  | 5 mg/kg SC  | C           | 162 (25)       | 101 (4.6)      | 8.2 (9.8)                   | 1.60                                               |
|                                                           | 20 mg/kg IV |             | 1046 (462)     | 692 (87)       | 11 (8.0)                    | 1.51                                               |
| MW965.26                                                  | 5 mg/kg SC  | C           | 339 (97)       | 203 (44)       | 36 (36)                     | 1.67                                               |

|            |             |   |            |            |          |      |
|------------|-------------|---|------------|------------|----------|------|
|            | 20 mg/kg IV |   | 2104 (685) | 1473 (440) | 49 (6.5) | 1.43 |
| ZM249M_PL1 | 5 mg/kg SC  | C | 84 (46)    | 79 (22)    | 5 (0)    | 1.06 |
|            | 20 mg/kg IV |   | 854 (522)  | 1208 (602) | 5 (0)    | 0.71 |
| ZM53M_PB12 | 5 mg/kg SC  | C | 8.5 (11)   | 5 (0)      | 5 (0)    | 1.70 |
|            | 20 mg/kg IV |   | 100 (31)   | 80 (41)    | 5 (0)    | 1.25 |
| 3016_V5    | 5 mg/kg SC  | D | 80 (7.7)   | 132 (32)   | 9.7 (18) | 0.60 |
|            | 20 mg/kg IV |   | 585 (232)  | 894 (41)   | 21 (2.8) | 0.65 |
| 57128_VR   | 5 mg/kg SC  | D | 5 (0)      | 5 (0)      | 5 (0)    | 1.00 |
|            | 20 mg/kg IV |   | 19 (19)    | 7.4 (6.4)  | 5 (0)    | 2.59 |

IV= intravenous, SC= subcutaneous

<sup>a</sup>Fold difference (VRC07-523LS/VRC01LS) was calculated as the ID<sub>50</sub> GMT of VRC07-523LS divided by the ID<sub>50</sub> GMT of VRC01LS.

<sup>b</sup>Subjects who received VRC01 at 5mg/kg SC received 2 doses of antibody: at weeks 0 and 4.

ID<sub>50</sub> values <10 are calculated as 5.

**Table S6. Comparison of ID<sub>80</sub> values at 12 weeks post administration for VRC07-523LS, VRC01LS, and VRC01**

| Virus                                                     | Dose Group  | Virus clade | VRC07-523LS    | VRC01LS        | VRC01                       | Fold difference (VRC07-523LS/VRC01LS) <sup>a</sup> |
|-----------------------------------------------------------|-------------|-------------|----------------|----------------|-----------------------------|----------------------------------------------------|
| <b>Serum Concentration mcg/mL (SD)</b>                    |             |             |                |                |                             |                                                    |
|                                                           | 5 mg/kg SC  |             | 6.7 (1.4), n=7 | 27 (7.1), n=18 | 3.7 (1.1), n=3 <sup>b</sup> | 0.25                                               |
|                                                           | 20 mg/kg IV |             | 45 (12), n=8   | 163 (53), n=13 | 5.2 (0.7), n=3              | 0.28                                               |
| <b>Neutralization Titer ID<sub>80</sub> GMT (SD), n=3</b> |             |             |                |                |                             |                                                    |
| BG505_W6M_C2                                              | 5 mg/kg SC  | A           | 28 (15)        | 50 (17)        | 7.4 (6.4)                   | 0.56                                               |
|                                                           | 20 mg/kg IV |             | 214 (125)      | 284 (42)       | 8.3 (3.3)                   | 0.76                                               |
| Q23.17                                                    | 5 mg/kg SC  | A           | 41 (14)        | 45 (1.3)       | 5 (0)                       | 0.91                                               |
|                                                           | 20 mg/kg IV |             | 255 (125)      | 363 (8.7)      | 5 (0)                       | 0.70                                               |
| BJOX028000_10_3                                           | 5 mg/kg SC  | AE          | 113 (41)       | 5 (0)          | 5 (0)                       | 22.55                                              |
|                                                           | 20 mg/kg IV |             | 830 (337)      | 44 (23)        | 5 (0)                       | 19.05                                              |
| CNE59                                                     | 5 mg/kg SC  | AE          | 6.7 (4)        | 5 (0)          | 5 (0)                       | 1.34                                               |
|                                                           | 20 mg/kg IV |             | 65 (19)        | 28 (1.3)       | 5 (0)                       | 2.32                                               |
| PVO.04                                                    | 5 mg/kg SC  | B           | 7.8 (7.9)      | 5 (0)          | 5 (0)                       | 1.55                                               |
|                                                           | 20 mg/kg IV |             | 85 (34)        | 58 (5.9)       | 5 (0)                       | 1.37                                               |
| THRO.18                                                   | 5 mg/kg SC  | B           | 5 (0)          | 5 (0)          | 5 (0)                       | 1.00                                               |
|                                                           | 20 mg/kg IV |             | 6.5 (3.3)      | 5 (0)          | 5 (0)                       | 1.29                                               |
| 21197826                                                  | 5 mg/kg SC  | C           | 5 (0)          | 5 (0)          | 5 (0)                       | 1.00                                               |
|                                                           | 20 mg/kg IV |             | 7.0 (5.1)      | 5 (0)          | 5 (0)                       | 1.40                                               |
| 21369737                                                  | 5 mg/kg SC  | C           | 8.1 (9.4)      | 5 (0)          | 5 (0)                       | 1.62                                               |
|                                                           | 20 mg/kg IV |             | 138 (64)       | 5 (0)          | 5 (0)                       | 27.55                                              |
| 21561324                                                  | 5 mg/kg SC  | C           | 32 (20)        | 5 (0)          | 5 (0)                       | 6.32                                               |
|                                                           | 20 mg/kg IV |             | 331 (200)      | 5 (0)          | 5 (0)                       | 66.25                                              |
| 6322.V4.C1                                                | 5 mg/kg SC  | C           | 13 (13)        | 5 (0)          | 5 (0)                       | 2.65                                               |
|                                                           | 20 mg/kg IV |             | 159 (51)       | 5 (0)          | 5 (0)                       | 31.8                                               |
| 6631_V3                                                   | 5 mg/kg SC  | C           | 5 (0)          | 5 (0)          | 5 (0)                       | 1.00                                               |
|                                                           | 20 mg/kg IV |             | 5 (0)          | 5 (0)          | 5 (0)                       | 1.00                                               |
| CAP210                                                    | 5 mg/kg SC  | C           | 5 (0)          | 5 (0)          | 5 (0)                       | 1.00                                               |
|                                                           | 20 mg/kg IV |             | 5 (0)          | 5 (0)          | 5 (0)                       | 1.00                                               |
| CAP382_2                                                  | 5 mg/kg SC  | C           | 5 (0)          | 5 (0)          | 5 (0)                       | 1.00                                               |
|                                                           | 20 mg/kg IV |             | 7.1 (5.4)      | 5 (0)          | 5 (0)                       | 1.42                                               |
| CT565_C7                                                  | 5 mg/kg SC  | C           | 5 (0)          | 5 (0)          | 5 (0)                       | 1.00                                               |
|                                                           | 20 mg/kg IV |             | 5 (0)          | 5 (0)          | 5 (0)                       | 1.00                                               |
| DU156.12                                                  | 5 mg/kg SC  | C           | 55 (11)        | 39 (8.0)       | 5 (0)                       | 1.41                                               |
|                                                           | 20 mg/kg IV |             | 397 (125)      | 230 (31)       | 5 (0)                       | 1.73                                               |
| MW965.26                                                  | 5 mg/kg SC  | C           | 101 (12)       | 76 (25)        | 9.1 (15)                    | 1.33                                               |

|            |             |   |           |            |          |      |
|------------|-------------|---|-----------|------------|----------|------|
|            | 20 mg/kg IV |   | 763 (425) | 435 (141)  | 18 (3.9) | 1.76 |
| ZM249M_PL1 | 5 mg/kg SC  | C | 18 (10)   | 41 (16)    | 5 (0)    | 0.45 |
|            | 20 mg/kg IV |   | 208 (86)  | 234 (61)   | 5 (0)    | 0.89 |
| ZM53M_PB12 | 5 mg/kg SC  | C | 5 (0)     | 5 (0)      | 5 (0)    | 1.00 |
|            | 20 mg/kg IV |   | 37 (14)   | 27 (25)    | 5 (0)    | 1.37 |
| 3016_V5    | 5 mg/kg SC  | D | 24 (7.4)  | 47 (12)    | 5 (0)    | 0.51 |
|            | 20 mg/kg IV |   | 202 (87)  | 353.4 (60) | 5 (0)    | 0.57 |
| 57128_VR   | 5 mg/kg SC  | D | 5 (0)     | 5 (0)      | 5 (0)    | 1.00 |
|            | 20 mg/kg IV |   | 5 (0)     | 5 (0)      | 5 (0)    | 1.00 |

IV= intravenous, SC= subcutaneous

<sup>a</sup>Fold difference (VRC07-523LS/VRC01LS) was calculated as the ID<sub>80</sub> GMT of VRC07-523LS divided by the ID<sub>80</sub> GMT of VRC01LS.

<sup>b</sup>Subjects who received VRC01 at 5mg/kg SC received 2 doses of antibody: at weeks 0 and 4.

ID<sub>80</sub> values <10 are calculated as 5.



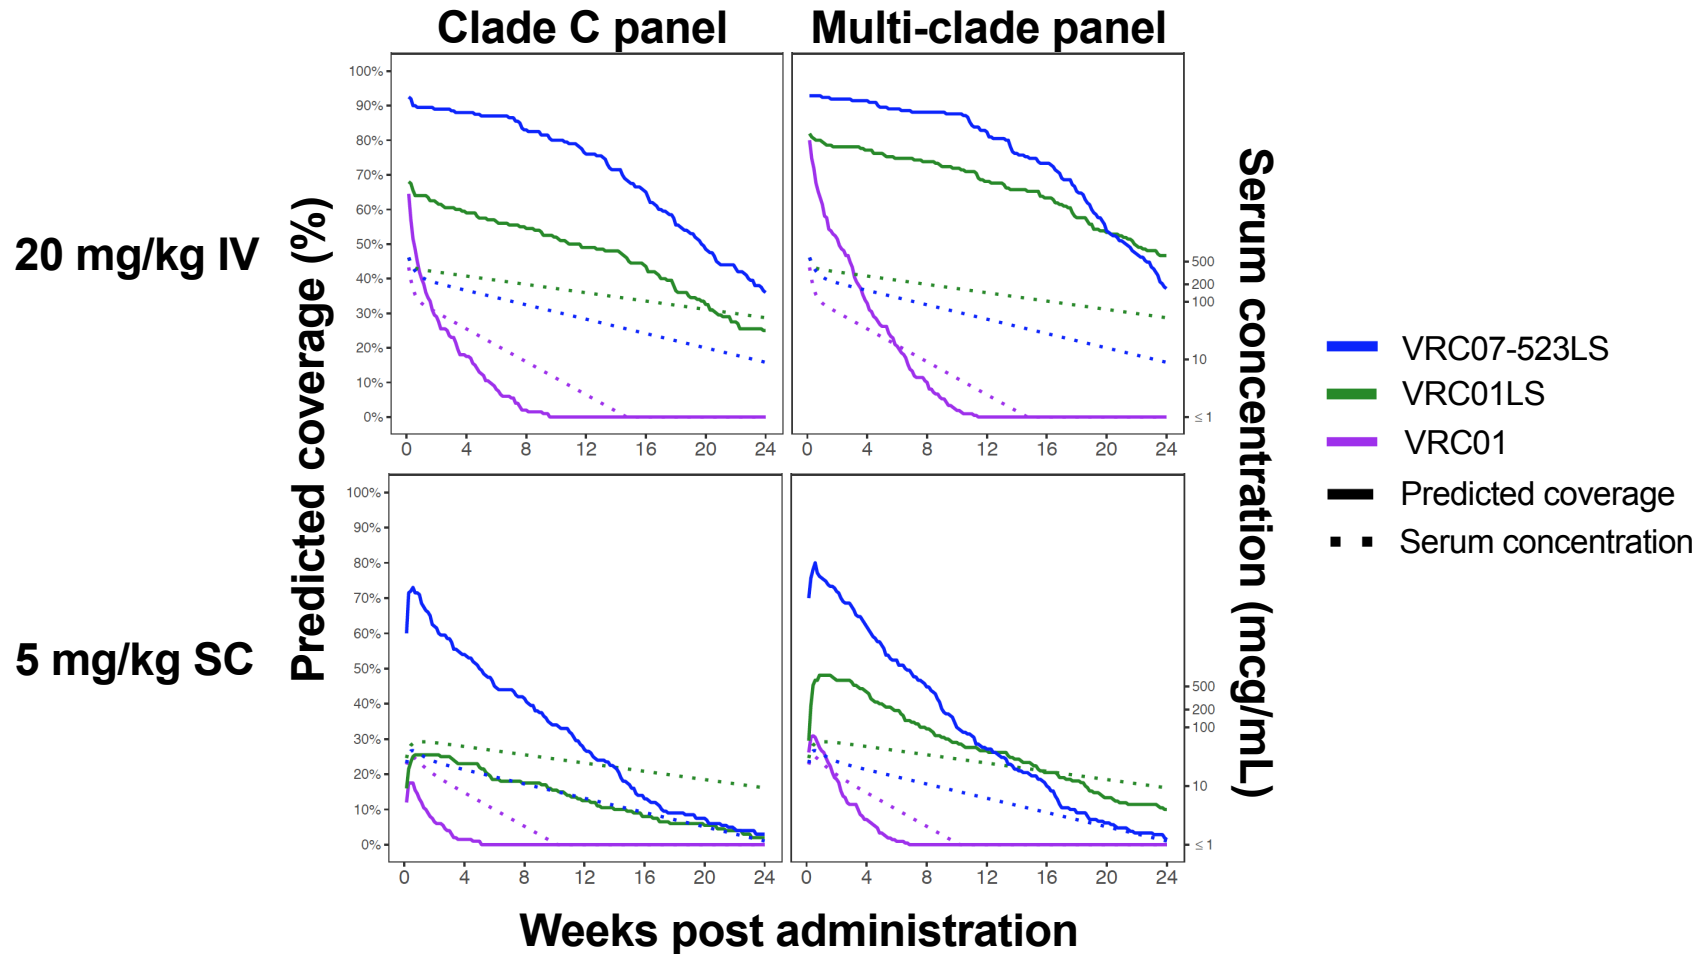

**Figure S6. Predicted coverage of VRC07-523LS, VRC01LS, and VRC01 for the first 24 weeks after a single administration based on known  $IC_{80}$  values.** Predicted coverages shown for either 20 mg/kg IV (top panels) or 5 mg/kg SC (bottom panels). The left panels display the percentage of viruses with predicted coverage based on a panel of acute/early clade C Env-pseudoviruses, while the right panels display the predicted coverage based on a panel of diverse multi-clade Env-pseudoviruses. Predicted coverage at a given concentration was defined as the % of viruses for which the  $IC_{50}$  value was 100-fold higher than the serum concentration, and a virus was considered resistant if the  $IC_{50}$  was greater than 10 mcg/mL. The solid lines indicate the geometric mean of the predicted coverage for each bnMAB and the dotted lines reference the serum concentrations for the subjects in each dose group.
